# Supplementary material for: Screens in aging-relevant human ALS-motor neurons identify MAP4Ks as therapeutic targets for the disease
Source: PubMed Central journal article supplement (PMC10766628; doi:10.1038/s41419-023-06395-7), 2024-01-04
Supplement: 41419_2023_6395_MOESM2_ESM.pdf [file 41419_2023_6395_MOESM2_ESM.pdf]

Table S1. Sources of fibroblasts examined in this work.

| <b>Name in this study</b> | <b>Alternative Name</b> | <b>Company (Catalog ID)</b> | <b>Origin</b> | <b>Age</b> | <b>Gender</b> | <b>Disease</b>                                                  |
|---------------------------|-------------------------|-----------------------------|---------------|------------|---------------|-----------------------------------------------------------------|
| NL1                       | AG05811                 | Coriell                     | Skin          | 71 Years   | Female        | Apparently Healthy                                              |
| NL2                       | AG08517                 | Coriell                     | Skin          | 66 Years   | Female        | Apparently Healthy                                              |
| NL3                       | AG09969                 | Coriell                     | Skin          | 53 Years   | Male          | Apparently Healthy                                              |
| NL4                       | AG11733                 | Coriell                     | Skin          | 70 Years   | Female        | Apparently Healthy                                              |
| NL5                       | AG12989                 | Coriell                     | Skin          | 47 Years   | Male          | Apparently Healthy                                              |
| ALS1                      | ND29563                 | Coriell                     | Skin          | 37 Years   | Male          | FUS: R522R                                                      |
| ALS2                      | ND39027                 | Coriell                     | Skin          | 50 Years   | Female        | FUS: H517Q                                                      |
| ALS3                      | ND40077                 | Coriell                     | Skin          | 47 Years   | Female        | FUS: R521G                                                      |
| ALS4                      | ND29774                 | Coriell                     | Skin          | 68 Years   | Female        | SOD1: D90A                                                      |
| ALS5                      | F09229                  | Baloh Lab                   | Skin          | 46 Years   | Male          | C9orf72 hexanucleotide repeat expansion (6-8kb expanded allele) |
| ALS6                      | ND32947                 | Coriell                     | Skin          | 64 Years   | Male          | TDP43: G298S                                                    |
| ALS7                      | C9-4                    | Corey Lab                   | Skin          | 61 Years   | Male          | C9orf72 hexanucleotide repeat expansion, Bulbar                 |
| ALS8                      | C9-5                    | Corey Lab                   | Skin          | 69 Years   | Female        | C9orf72 hexanucleotide repeat expansion, Bulbar, FTD suspected  |
