# Supplementary material for: Screens in aging-relevant human ALS-motor neurons identify MAP4Ks as therapeutic targets for the disease
Source: PubMed Central journal article supplement (PMC10766628; doi:10.1038/s41419-023-06395-7), 2024-01-04
Supplement: 41419_2023_6395_MOESM4_ESM.pdf [file 41419_2023_6395_MOESM4_ESM.pdf]

Table S3. Chemical information of Top 15 hits and controls.

| No.   | Plate No.        | CAT No.      | Product Name                    | Secondary Hit Score | Targets                   |
|-------|------------------|--------------|---------------------------------|---------------------|---------------------------|
| Hit1  | L1700-20c3       | <b>S7193</b> | <b>1-Azakenpaullone</b>         | 132.04              | GSK-3                     |
| Hit2  | L1700-2a3        | <b>S1134</b> | <b>AT9283</b>                   | 124.97              | JAK,Aurora Kinase,Bcr-Abl |
| Hit3  | L1700-21a2       | <b>S7359</b> | <b>K02288</b>                   | 120.10              | TGF-beta/Smad             |
| Hit4  | L1700-19g11      | <b>S7145</b> | <b>AZD1080</b>                  | 119.17              | GSK-3                     |
| Hit5  | L1700-20e6       | <b>S7253</b> | <b>AZD2858</b>                  | 116.00              | GSK-3                     |
| Hit6  | L1700-1b8        | <b>S1075</b> | <b>SB216763</b>                 | 111.80              | GSK-3                     |
| Hit7  | L1700-1d6        | <b>S1055</b> | <b>Enzastaurin (LY317615)</b>   | 109.33              | PKC                       |
| Hit8  | L1700-3d5        | <b>S1274</b> | <b>BX-795</b>                   | 97.62               | IkB/IKK,PDK-1             |
| Hit9  | L1700-14c11      | <b>S2924</b> | <b>CHIR-99021 (CT99021) HCl</b> | 89.27               | GSK-3                     |
| Hit10 | L1700-9h4        | <b>S2201</b> | <b>BMS-794833</b>               | 87.41               | VEGFR,c-Met               |
| Hit11 | L1700-14g3       | <b>S2843</b> | <b>BI-D1870</b>                 | 60.28               | S6 Kinase                 |
| Hit12 | L1700-5e5        | <b>S1570</b> | <b>KU-60019</b>                 | 57.73               | ATM/ATR                   |
| Hit13 | L1700-20f3       | <b>S7198</b> | <b>BIO</b>                      | 55.40               | GSK-3                     |
| Hit14 | L1700-13h5       | <b>S2735</b> | <b>MK-8776 (SCH 900776)</b>     | 49.07               | CDK/Chk                   |
| Hit15 | L1700-20a5       | <b>S7223</b> | <b>RepSox</b>                   | 46.27               | TGF- $\beta$              |
| A83   |                  |              | <b>A83-01</b>                   |                     | TGF- $\beta$              |
| AC    | Hit3 analog      |              | <b>LDN214117</b>                |                     | TGF- $\beta$              |
| ALKi1 |                  |              | <b>LDN-193189</b>               |                     | TGF- $\beta$              |
| ALKi2 | L1700-20a1       | <b>S7147</b> | <b>LDN-212854</b>               |                     | TGF- $\beta$              |
| PC    | Positive control |              | <b>Kenpaullone</b>              | 100.00              | GSK-3/HGK                 |
| NC    | Negative control |              | <b>DMSO</b>                     |                     |                           |
