# Supplementary material for: Screens in aging-relevant human ALS-motor neurons identify MAP4Ks as therapeutic targets for the disease
Source: PubMed Central journal article supplement (PMC10766628; doi:10.1038/s41419-023-06395-7), 2024-01-04
Supplement: 41419_2023_6395_MOESM6_ESM.pdf [file 41419_2023_6395_MOESM6_ESM.pdf]

### Hit3 (K02288)

| Plasma     |              |           | Brain       |           | Spinal cord |           |
|------------|--------------|-----------|-------------|-----------|-------------|-----------|
| Time (min) | Conc (ng/ml) | std. dev. | Conc (ng/g) | std. dev. | Conc (ng/g) | std. dev. |
| 10         | 165          | 52.5      | 178         | 29.4      | 213         | 30.3      |
| 30         | 29.0         | 10.4      | 11.7        | 8.61      | 16.7        | 6.17      |
| 90         | 61.8         | 5.54      | 2.14        | 3.71      | 6.55        | 4.67      |
| 180        | 145          | 31.2      | 0           | 0         | 2.82        | 2.47      |
| 360        | 132          | 28.6      | 17.0        | 29.4      | 1.47        | 2.54      |
| 960        | 15.2         | 0.65      | 0           | 0         | 0           | 0         |
| 1440       | 3.09         | 5.13      | 0           | 0         | 0           | 0         |

### MAP4Ki (PF-6260933)

|            | Plasma       |           | Spinal Cord |           | Brain       |           |
|------------|--------------|-----------|-------------|-----------|-------------|-----------|
| Time (min) | Conc (ng/ml) | std. dev. | Conc (ng/g) | std. dev. | Conc (ng/g) | std. dev. |
| 10         | 2195         | 460       | 3792        | 788       | 5234        | 198       |
| 30         | 1435         | 375       | 4209        | 388       | 3827        | 116       |
| 120        | 348          | 57        | 867         | 263       | 885         | 9         |
| 240        | 106          | 50        | 316         | 12        | 317         | 128       |
| 480        | 94           | 19        | 200         | 11        | 247         | 97        |

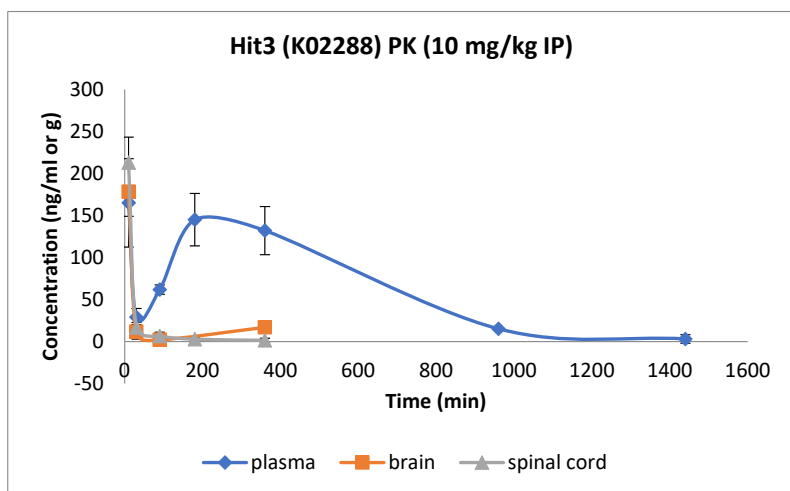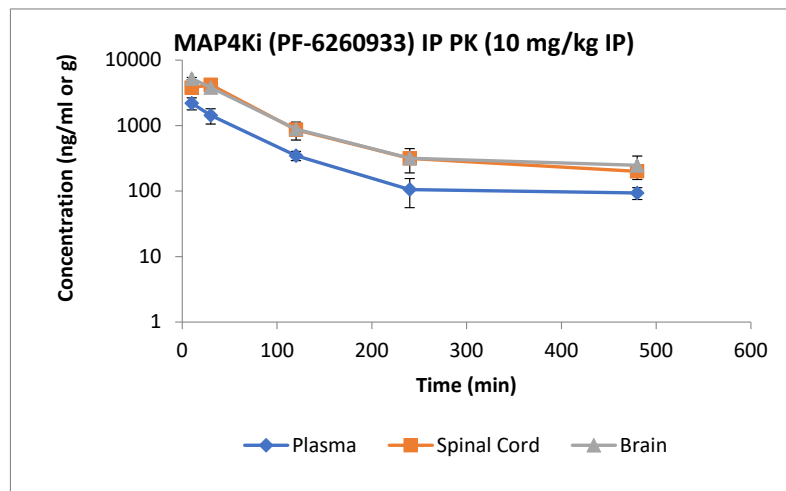

\*Brain concentrations were corrected for known volume of blood in brain but no correction value is known for spinal cord so that value is uncorrected.
