# Supplementary material for: Screens in aging-relevant human ALS-motor neurons identify MAP4Ks as therapeutic targets for the disease
Source: PubMed Central journal article supplement (PMC10766628; doi:10.1038/s41419-023-06395-7), 2024-01-04
Supplement: 41419_2023_6395_MOESM10_ESM.pdf [file 41419_2023_6395_MOESM10_ESM.pdf]

Figure 3A

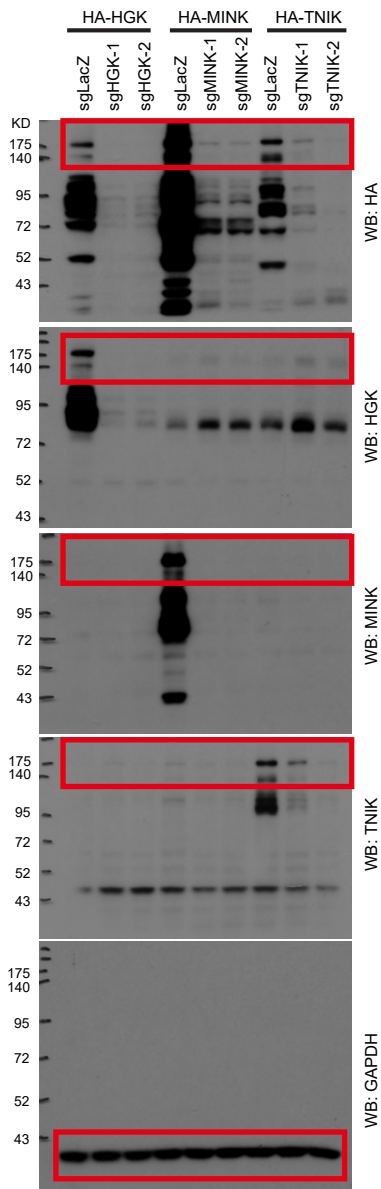

Figure 3D

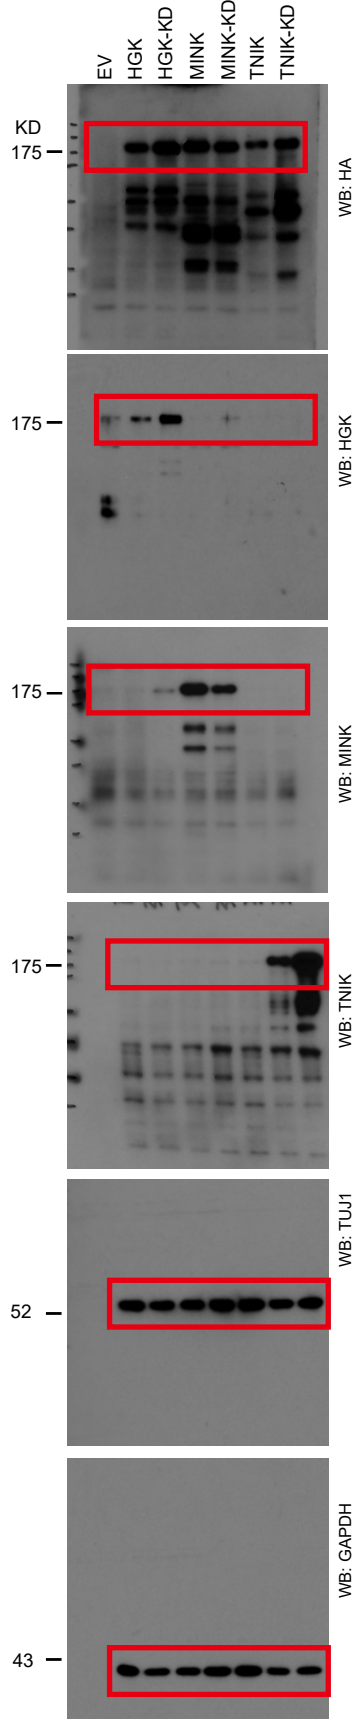

Figure 3F

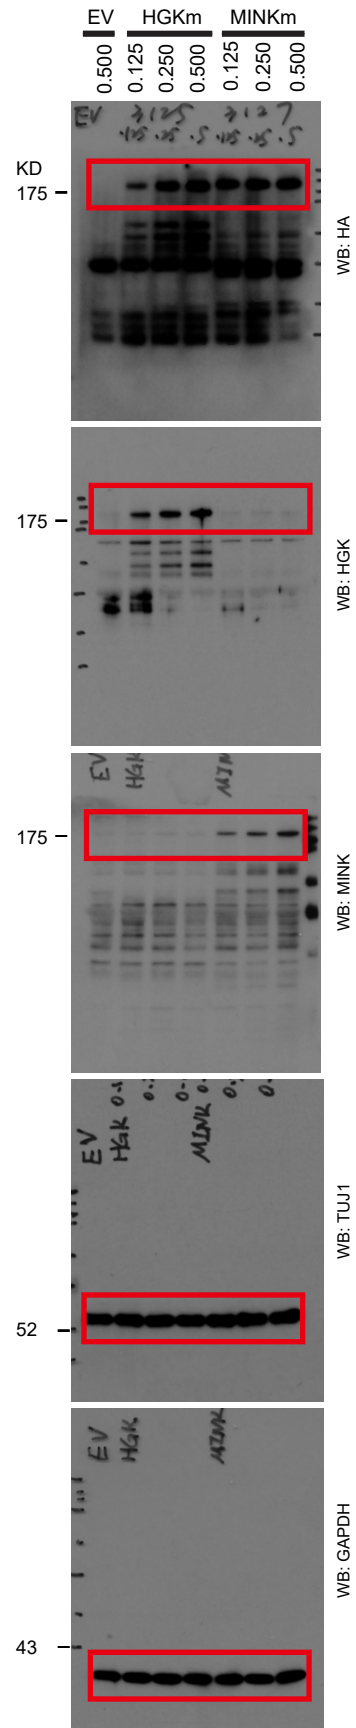

Figure S9-1. Full and uncropped western blots, related to Figure 3.

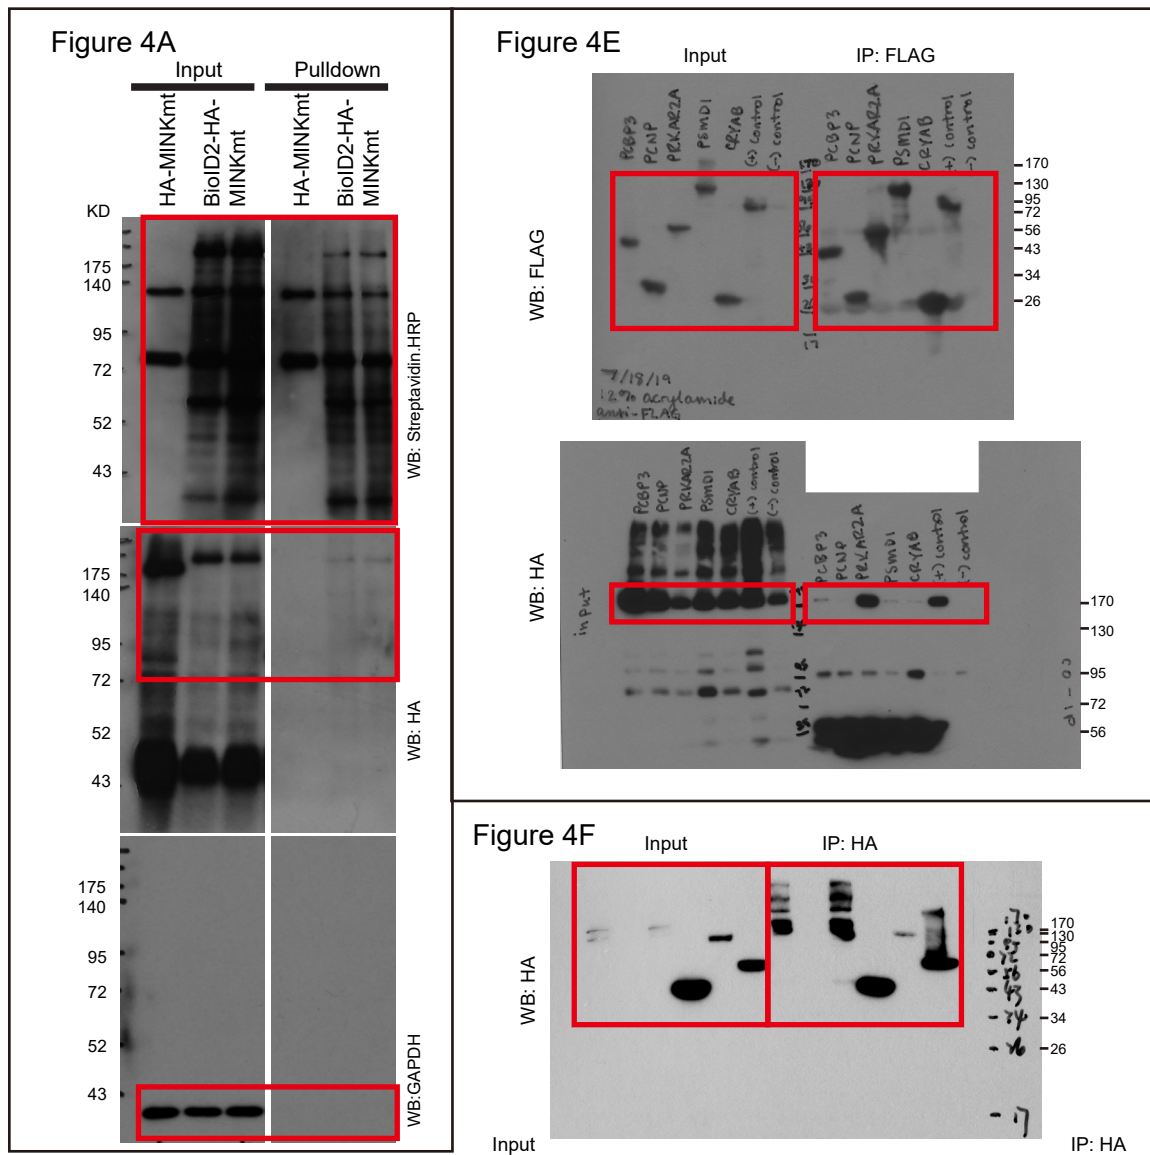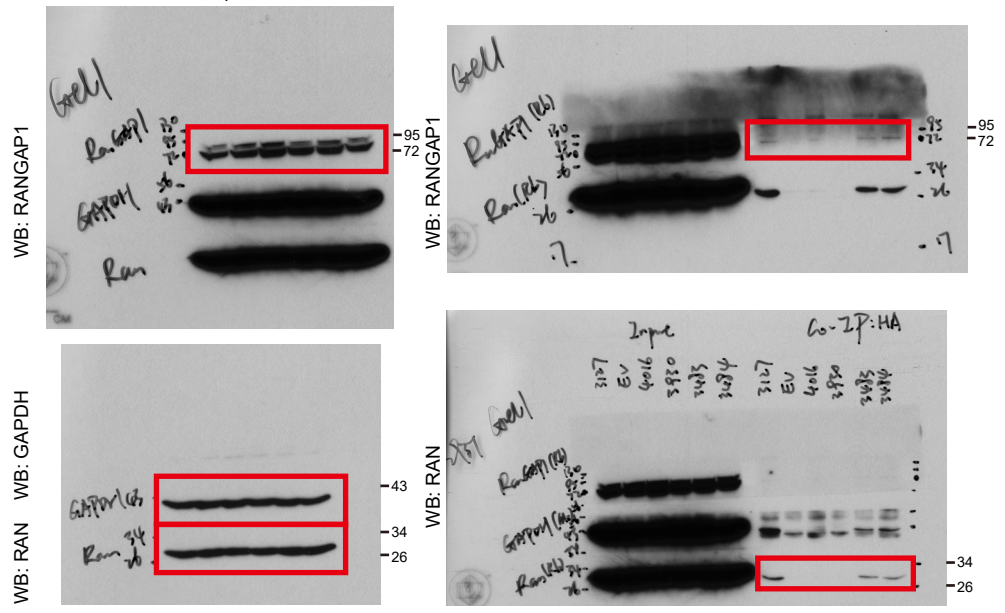

**Figure S9-2. Full and uncropped western blots, related to Figure 4.**

Figure 6D

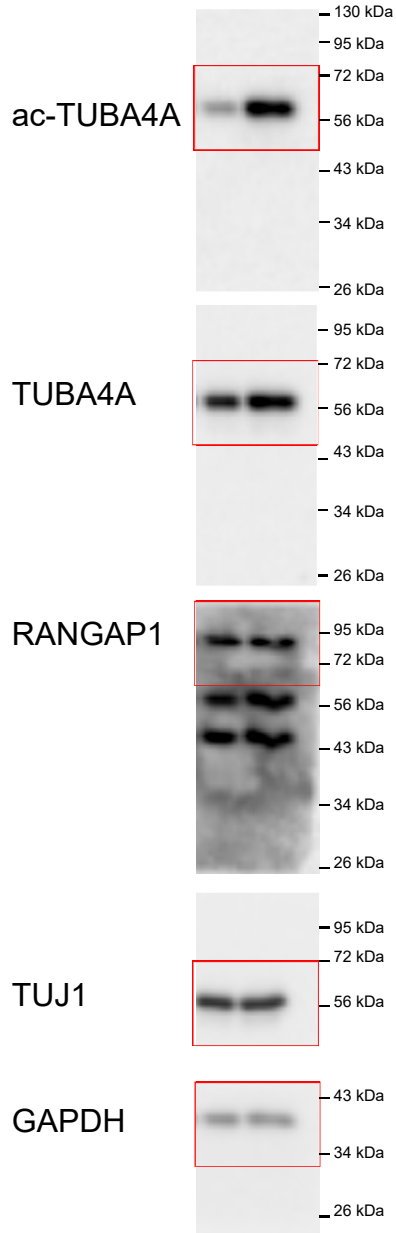

Figure 6L

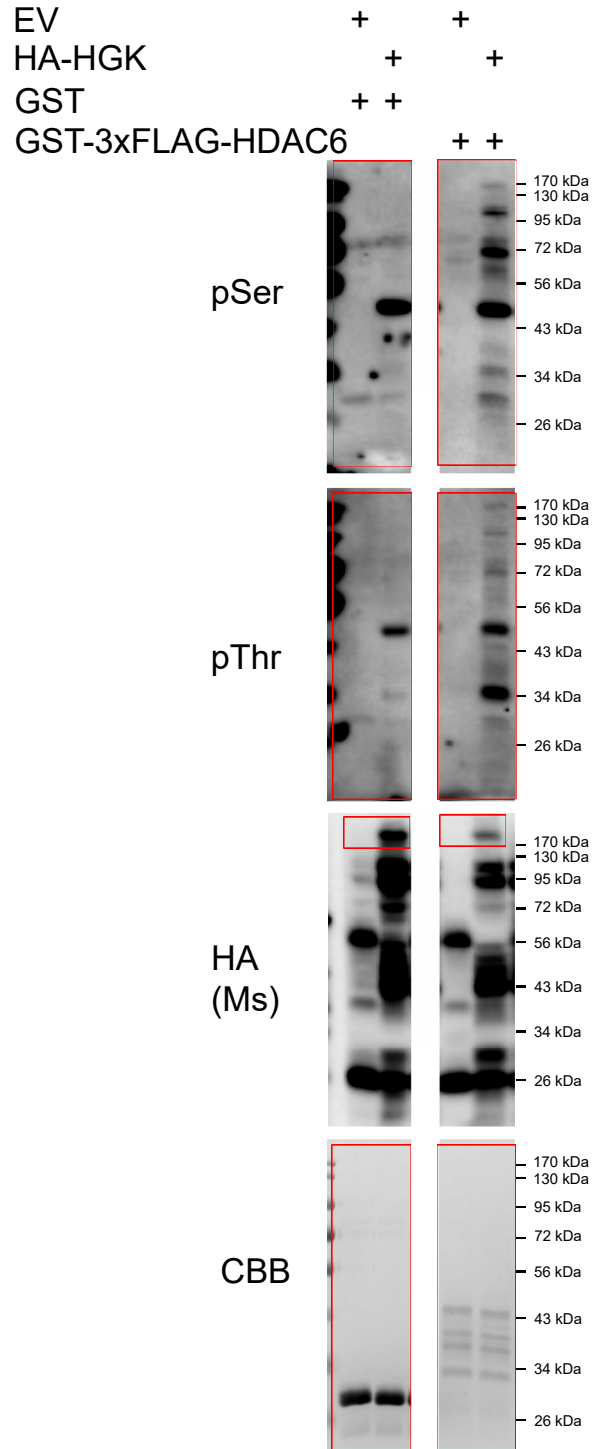

Figure S9-3. Full and uncropped western blots, related to Figure 6.

Figure S2B

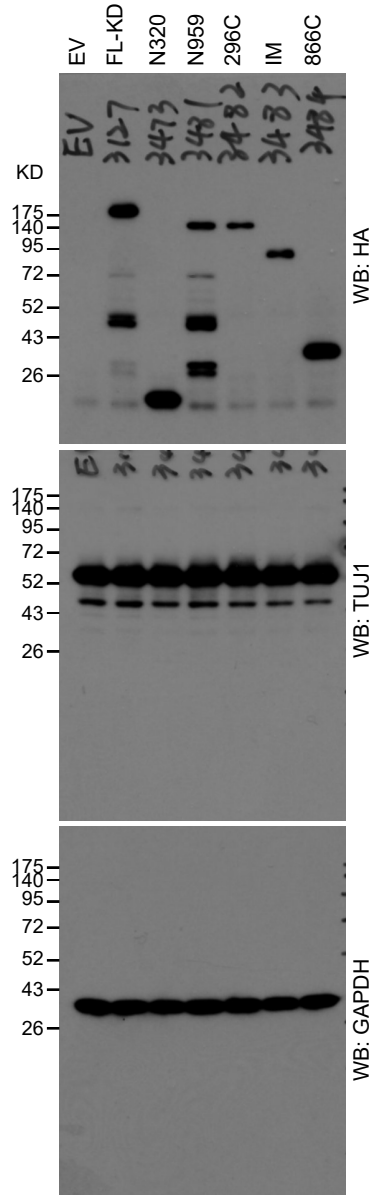

Figure S9-4. Full and uncropped western blots, related to Figure S2.

Figure S5A

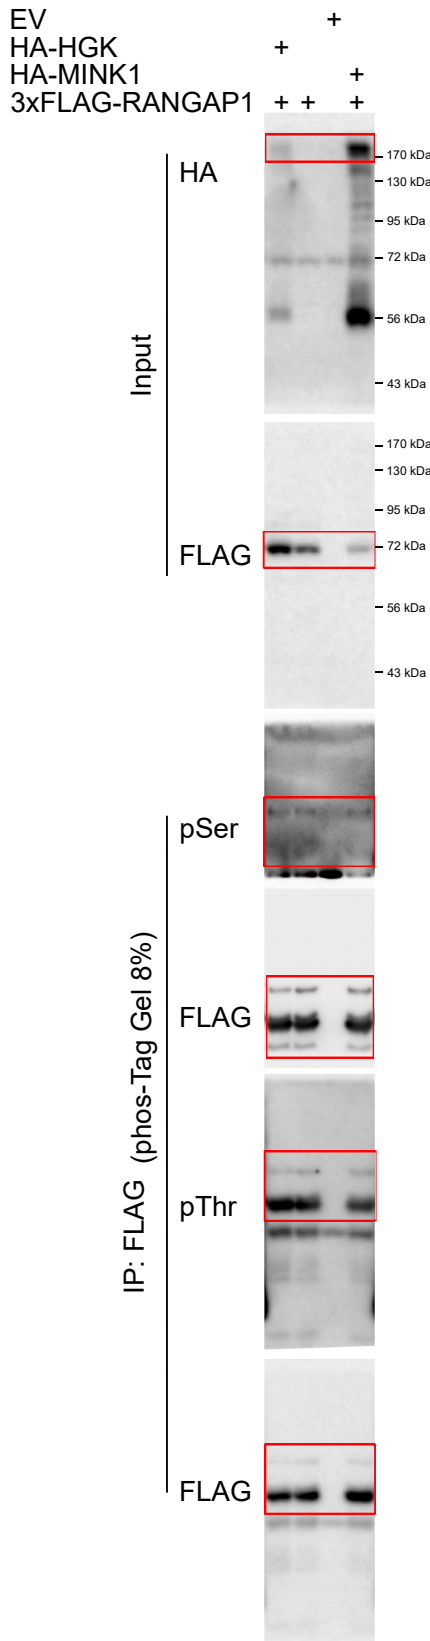

Figure S5B

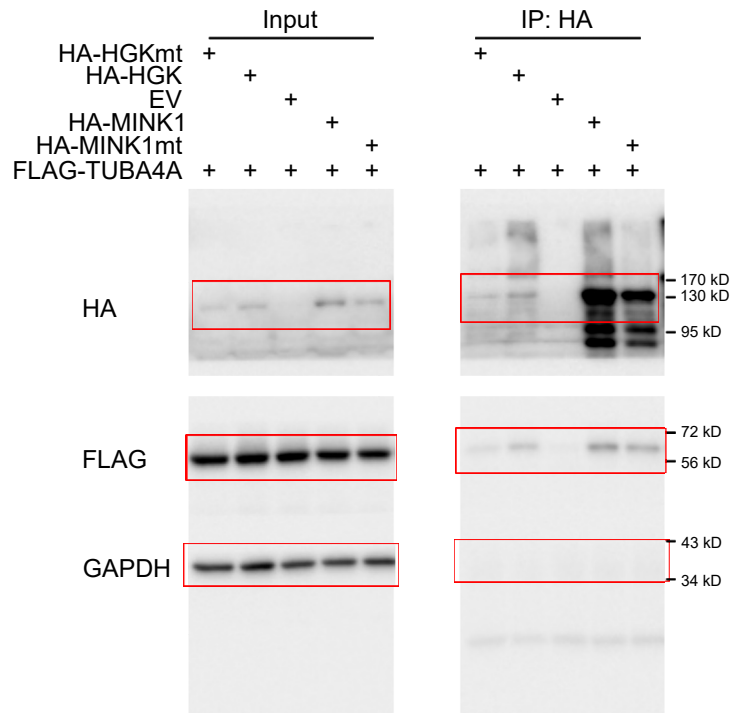

Figure S9-5. Full and uncropped western blots, related to Figure S5A-B.

Figure S5C

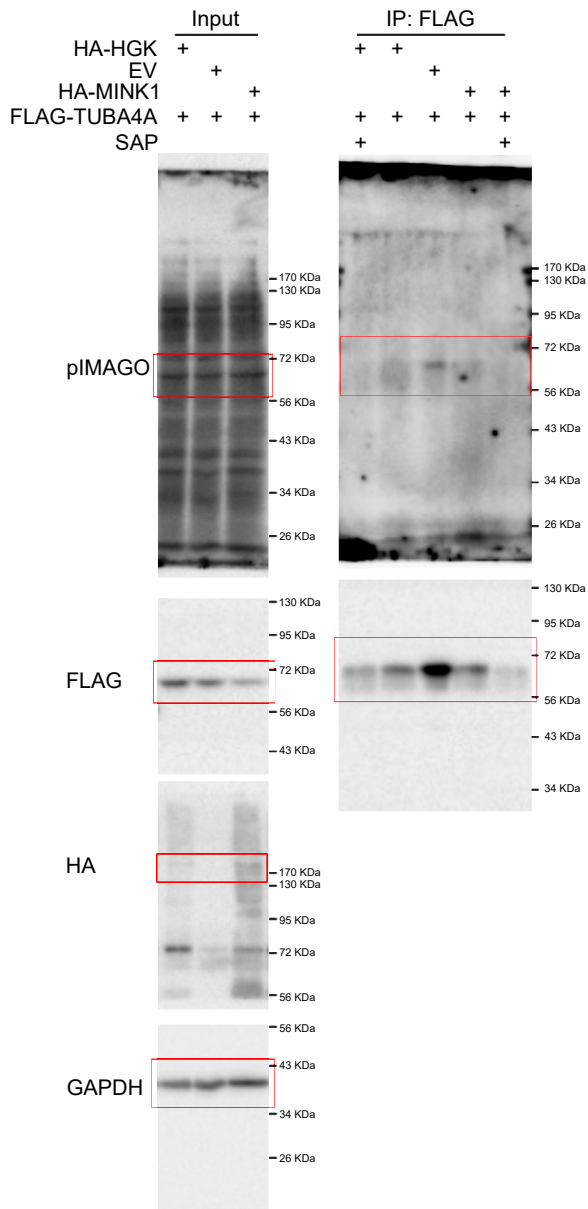

Figure S5D

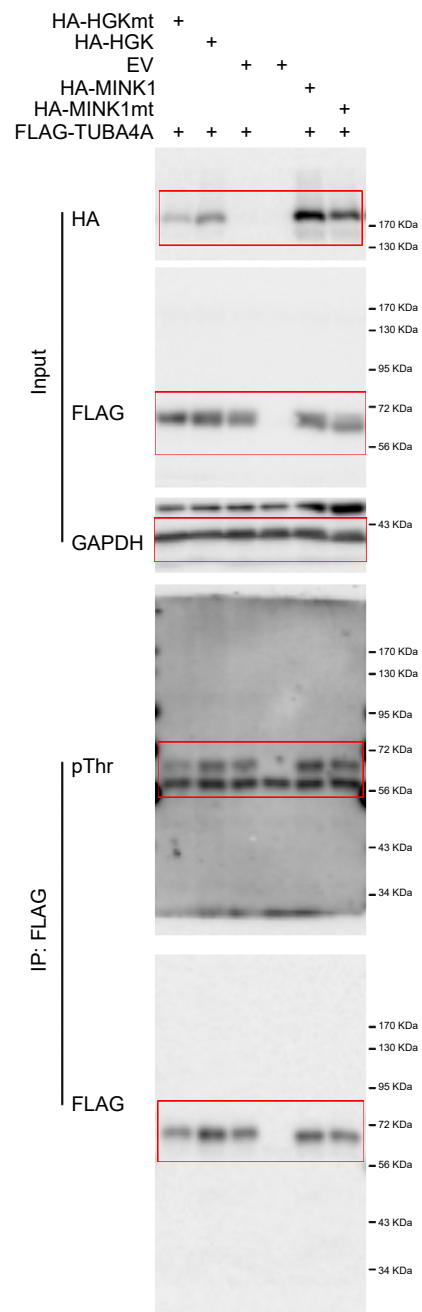

Figure S9-6. Full and uncropped western blots, related to Figure S5C-D.
